# Supplementary material for: Comparison of Breast Cancer to Healthy Control Tissue Discovers Novel Markers with Potential for Prognosis and Early Detection
Source: PubMed Central journal article supplement (PMC2817747; doi:10.1371/journal.pone.0009122), 2010-02-09
Supplement: pone.0009122.s004.pdf [file pone.0009122.s004.pdf]

| Pt | Age | Diagnosis | Stage | Grade | Tumor Size (cm) | LN p/n | BI-RADS | Breast Density | Race | HR Status | ERBB2 Status | Previous Cancer         | Neoadjuvant chemo | Chemo | Radiation | Recurrence         | PFI | Survival since diagnosis | Vital Status          | Tissue(s) per patient  | NML in cancer cluster | Cancer in basal-enriched cluster | Cancer in luminal-like cluster |
|----|-----|-----------|-------|-------|-----------------|--------|---------|----------------|------|-----------|--------------|-------------------------|-------------------|-------|-----------|--------------------|-----|--------------------------|-----------------------|------------------------|-----------------------|----------------------------------|--------------------------------|
| 1  | 49  | IDC       | 2a    | 3     | 1.7             | 1/25   | 5       | 1              | W    | +         | -            | Ovarian 32 mo prior     |                   | Yes   | No        |                    |     | 37                       | Alive NED             | NI                     |                       |                                  |                                |
| 2  | 37  | IDC       | 2a    | 2     | 0.8             | 1/14   | 5       | 2              | W    | +         | +            |                         |                   | Yes   | No        | No                 |     | 50                       | Alive, Unknown Status | NI (fatty)             |                       |                                  |                                |
| 3  | 44  | IDC       | 2b    | 3     | 2.0             | 2/18   | 5       | 2              | W    | +         | -            | Cervical 25 mo prior    |                   | Yes   | Yes       | No                 |     | 55                       | Alive NED             | CA                     |                       |                                  | *                              |
| 4  | 81  | IDC       | 2a    | 2     | 4.5             | 0/14   | 4       | 2              | W    | +         | -            |                         |                   | No    | No        | No                 |     | 55                       | Alive NED             | NI                     |                       |                                  |                                |
| 5  | 62  | IDC       | 2b    | 3     | 4.0             | 2/11   | 4       | 2              | W    | -         | +            | Uterine 175 mo prior    |                   | No    | No        | Local              | 11  | Expired w/ Breast CA     | CA, NI (fatty)        |                        |                       | *                                |                                |
| 6  | 47  | IDC       | 2c    | 3     | 7.0             | 19/36  | 4       | 0              | W    | -         | -            |                         |                   | Yes   | Yes       | Distant            |     | 21                       | Expired w/ Breast CA  | CA                     |                       |                                  | *                              |
| 7  | 37  | IDC       |       | 3     | 5.5             | 6/10   | 4       |                | W    | -         | +            |                         | *                 | Yes   | No        | Distant            | 7   | Expired w/ Breast CA     | CA, NI                | *                      |                       |                                  |                                |
| 8  | 56  | IDC       | 2b    | 3     | 3.2             | 1/4    | 5       | 3              | W    | -         | -            |                         |                   | Yes   | No        | No                 |     | 52                       | Alive NED             | CA, NI                 |                       |                                  | *                              |
| 9  | 60  | IDLC      | 2b    | 3     | 2.2             | 1/24   | 2       | 3              | W    | +         | -            |                         |                   | Yes   | No        | No                 |     | 52                       | Alive NED             | CA                     |                       |                                  | *                              |
| 10 | 82  | IDC       | 2b    | 3     | 5.0             | 3/18   | 5       | 2              | W    | -         | -            |                         |                   | Yes   | Yes       | No                 |     | 52                       | Alive NED             | CA                     |                       |                                  | *                              |
| 11 | 52  | DCIS      |       | 3     | 1.6             | 0/2    | 3       | 2              | W    | +         |              |                         |                   | No    | No        | No                 |     | 52                       | Alive NED             | NI                     |                       |                                  |                                |
| 12 | 58  | MET       | 2a    | 3     | 7.0             | 1/27   | 4       | 2              | W    | -         | +            |                         |                   | No    | No        | No                 |     | 52                       | Alive NED             | CA, NI                 |                       | *                                |                                |
| 13 | 36  | IDC       | 2b    | 3     | 2.1, 1.5, 0.2   | 1/25   | 5       | 3              | W    | +         | +            |                         |                   | Yes   | Yes       | No                 |     | 50                       | Alive NED             | CA, NI                 | *                     |                                  | *                              |
| 14 | 39  | IDC       | 2a    | 3     | 0.8-5.1         | 2/19   | 5       | 1              | W    | +         | -            |                         |                   | Yes   | No        | Distant            |     | 52                       | Alive w/ Breast CA    | CA, NI                 |                       | *                                |                                |
| 15 | 56  | ILC       | 3c    | 2     | 10.0            | 16/28  | 4       | 2              | W    | +         | -            |                         |                   | Yes   | Yes       | Distant            |     | 52                       | Alive w/ Breast CA    | NI (fatty)             |                       |                                  | *                              |
| 16 | 50  | IDC       | 3c    | 3     | Multifocal      | 15/19  | 4       | 3              | W    | +         | -            | Breast 1 mo prior       | *                 | Yes   | Yes       | No                 |     | 53                       | Alive NED             | CA, NI, NC (fatty)     | *                     |                                  | *                              |
| 17 | 71  | IDC       | 2b    | 3     | 4.7             | 2/35   | 5       | 2              | B    | +         | -            |                         |                   | No    | No        | Distant            | 9   | 12                       | Expired w/ Breast CA  | CA, NI (fatty)         |                       | *                                |                                |
| 18 | 60  | ILC       | 2c    | 2     | 7.0             | 17/21  | 0       | 1              | W    | +         | -            |                         |                   | Yes   | Yes       | No                 |     | 47                       | Alive NED             | CA, NI                 |                       |                                  | *                              |
| 19 | 76  | IDC       | 1     | 2     | 0.8             | 0/5    | 4       | 2              | W    | +         | -            | Skin 273 mo prior       |                   | No    | No        | No                 |     | 47                       | Alive NED             | NI (fatty)             | *                     |                                  |                                |
| 20 | 64  | IDC       | 2b    | 3     | 3.7             | 1/17   | 4       | 2              | W    | -         | +            |                         |                   | Yes   | Yes       | No                 |     | 47                       | Alive NED             | CA, NI                 |                       |                                  | *                              |
| 21 | 46  | IDC       |       |       | 6.0             | 2/13   | 5       | 1              | N    | +         | +            |                         |                   | Yes   | Yes       | No                 |     | 47                       | Alive NED             | CA, NI (fatty)         |                       |                                  | *                              |
| 22 | 35  | IDC       | 2b    | 2     | 3.8, 1.7        | 3/35   | 5       | 2              | W    | +         | +            |                         |                   | Yes   | Yes       | No                 |     | 47                       | Alive NED             | NI (fatty)             |                       |                                  | *                              |
| 23 | 71  | IDC       | 1     | 2     | 2.0             | 0/3    | 3       | 2              | W    | +         | -            |                         | *                 | Yes   | No        | No                 |     | 52                       | Alive NED             | NI                     |                       |                                  |                                |
| 24 | 79  | MET       | 2a    | 3     | 7.5             | 1/10   | 5       | 1              | B    | -         | -            |                         |                   | Yes   | No        | Distant            | 3   | 5                        | Expired w/ Breast CA  | CA, NI (fatty)         |                       | *                                |                                |
| 25 | 48  | IDC       | 1     | 2     | 1.1             | 0/21   | 1       | 2              | W    | +         | +            |                         |                   | Yes   | No        | No                 |     | 45                       | Alive NED             | NI                     |                       |                                  |                                |
| 26 | 56  | IDLC      | 3     | 3     | 8.3             |        | 5       |                | W    | -         | -            |                         | *                 | Yes   | No        | Local              | 7   | 10                       | Expired w/ Breast CA  | CA, NI                 | *                     |                                  | *                              |
| 27 | 60  | ILC       | 2a    | 2     | 4.5             | 0/8    | 5       | 2              | W    | +         | -            |                         |                   | Yes   | Yes       | Distant            | 7   | 42                       | Alive w/ Breast CA    | CA, NI                 | *                     |                                  | *                              |
| 28 | 67  | INF       | 3b    | 2.5   | 3.0             | 5/18   | 5       | 1              | W    | +         | -            |                         | *                 | Yes   | Yes       | No                 |     | 46                       | Alive NED             | NI                     |                       |                                  |                                |
| 29 | 57  | IDC       | 1     | 3     | 2.0             | 0/3    | 5       | 2              | W    | -         | -            | Breast 64 mo prior      |                   | Yes   | No        | No                 |     | 42                       | Alive NED             | NI (fatty)             | *                     |                                  |                                |
| 30 | 55  | IDC       | 2a    | 3     | 1.5             | 1/15   | 4       | 3              | W    | -         | -            |                         | *                 | Yes   | Yes       | No                 |     | 42                       | Alive NED             | CA                     |                       |                                  | *                              |
| 31 | 42  | IDC       | 3a    | 3     | 4.7             | 7/14   | 0       | 1              | W    | +         | +            |                         |                   | Yes   | No        | No                 |     | 41                       | Alive NED             | NI, NI                 | *                     |                                  |                                |
| 32 | 57  | IDC       | 1     | 2.3   | 1.1             | 1/8    | 4       | 1              | W    | +         | +            | Breast 120 months prior |                   | No    | Yes       | Never Disease Free | 0   |                          | Expired w/ Breast CA  | NI                     |                       |                                  |                                |
| 33 | 51  | MUC       | 2b    | 1     | 6.0             | 0/3    |         |                | W    | +         | -            |                         | *                 | Yes   | No        | No                 |     | 43                       | Alive NED             | CA, NI                 | *                     |                                  | *                              |
| 34 | 46  | IDC       | 2a    | 3     | 1.8             | 2/25   | 4       | 2              | W    | -         | +            |                         |                   | Yes   | No        | No                 |     | 41                       | Alive NED             | NI (fatty)             |                       |                                  |                                |
| 35 | 54  | ILC       | 2     | 2     | 3.0             | 1/9    | 5       | 1              | W    | +         | -            |                         |                   | Yes   | No        | No                 |     | 41                       | Alive NED             | NI                     | *                     |                                  |                                |
| 36 | 77  | IDC       | 1     | 2.5   | 1.1             | 1/8    | 4       | 1              | W    | +         | +            | Breast 123 mo prior     |                   | No    | Yes       | Never Disease Free | 0   | 140                      | Expired w/ Breast CA  | NI                     |                       |                                  |                                |
| 37 | 65  | IDC       | 1     | 3     | 2.0             | 0/2    | 4       | 1              | W    | +         | +            |                         |                   | No    | Yes       | No                 |     | 38                       | Alive NED             | NI, NI                 |                       |                                  |                                |
| 38 | 48  | IDC       | 2a    | 3     | 1.7             | 1/5    | 4       | 3              | W    | +         | -            | Breast 1 mo prior       |                   | Yes   | No        | No                 |     | 36                       | Alive NED             | NC, NC-M               | *                     |                                  |                                |
| 39 | 64  | IDC       | 2a    | 3     | 2.2             | 0/19   | 4       | 2              | W    | +         | -            | Skin, Vulva 66 mo prior |                   | No    | No        | No                 |     | 36                       | Alive NED             | NI-A                   | *                     |                                  |                                |
| 40 | 58  | IDC       | 3a    | 3     | 4.2             | 4/29   | 5       | 2              | W    | -         | -            |                         |                   | Yes   | No        | No                 |     | 35                       | Alive NED             | CA, NI                 |                       |                                  | *                              |
| 41 | 41  | IDC       | 3c    | 3     | 5.2             | 13/31  | 3       | 2              | W    | -         | +            |                         |                   | Yes   | No        | No                 |     | 34                       | Alive NED             | CA                     |                       |                                  | *                              |
| 42 | 32  | IDC       | 3a    | 3     | 6.0             | 3/20   | 5       | 2              | W    | +         | +            |                         |                   | Yes   | No        | No                 |     | 33                       | Alive NED             | CA                     |                       |                                  | *                              |
| 43 | 70  | ILC       | 3c    | 2     | 5.7             | 24/28  | 5       | 2              | W    | +         | -            | Lymph node 123 mo prior |                   | Yes   | No        | No                 |     | 30                       | Alive NED             | CA, CA, NI             |                       |                                  | *                              |
| 44 | 48  | DCIS      | 0     | 2     |                 | 0/1    |         |                | W    | +         | -            |                         |                   | No    | No        | No                 |     | 14                       | Alive NED             | NI (fatty)             |                       |                                  |                                |
| 45 | 61  | NML       |       |       |                 |        |         |                | W    |           |              |                         |                   |       |           |                    |     |                          |                       | NM                     |                       |                                  |                                |
| 46 |     | NML       |       |       |                 |        |         |                | W    |           |              |                         |                   |       |           |                    |     |                          |                       | NM                     |                       |                                  |                                |
| 47 | 45  | NML       |       |       |                 |        |         |                |      |           |              |                         |                   |       |           |                    |     |                          |                       | NM                     |                       |                                  |                                |
| 48 | 32  | NML       |       |       |                 |        |         |                |      |           |              |                         |                   |       |           |                    |     |                          |                       | NM                     |                       |                                  |                                |
| 49 | 43  | NML       |       |       |                 |        |         |                |      |           |              |                         |                   |       |           |                    |     |                          |                       | NM                     |                       |                                  |                                |
| 50 | 46  | NML       |       |       |                 |        |         |                |      |           |              |                         |                   |       |           |                    |     |                          |                       | NM                     |                       |                                  |                                |
| 51 | 28  | NML       |       |       |                 |        |         |                |      |           |              |                         |                   |       |           |                    |     |                          |                       | NM                     |                       |                                  |                                |
| 52 | 55  | NML       |       |       |                 |        |         |                | B    |           |              |                         |                   |       |           |                    |     |                          |                       | NM                     |                       |                                  |                                |
| 53 | 48  | NML       |       |       |                 |        |         |                | B    |           |              |                         |                   |       |           |                    |     |                          |                       | NM                     |                       |                                  |                                |
| 54 | 20  | NML       |       |       |                 |        |         |                | B    |           |              |                         |                   |       |           |                    |     |                          |                       | NM                     |                       |                                  |                                |
| 55 | 27  | NML       |       |       |                 |        |         |                | A    |           |              |                         |                   |       |           |                    |     |                          |                       | NM                     |                       |                                  |                                |
| 56 | 57  | NML       |       |       |                 |        |         |                | W    |           |              |                         |                   |       |           |                    |     |                          |                       | NM                     |                       |                                  |                                |
| 57 |     | NML       |       |       |                 |        |         |                | W    |           |              |                         |                   |       |           |                    |     |                          |                       | NM (fatty), NM (fatty) |                       |                                  |                                |
| 58 | 52  | NML       |       |       |                 |        |         |                |      |           |              |                         |                   |       |           |                    |     |                          |                       | NM                     |                       |                                  |                                |
| 59 | 35  | NML       |       |       |                 |        |         |                |      |           |              |                         |                   |       |           |                    |     |                          |                       | NM, NM (fatty)         |                       |                                  |                                |
| 60 | 27  | NML       |       |       |                 |        |         |                | W    |           |              |                         |                   |       |           |                    |     |                          |                       | NM, NM (fatty)         |                       |                                  |                                |
| 61 | 19  | NML       |       |       |                 |        |         |                | W    |           |              |                         |                   |       |           |                    |     |                          |                       | NM (fatty), NM (fatty) |                       |                                  |                                |
| 62 |     | NML       |       |       |                 |        |         |                | H    |           |              |                         |                   |       |           |                    |     |                          |                       | NM                     |                       |                                  |                                |
| 63 |     | NML       |       |       |                 |        |         |                | B    |           |              |                         |                   |       |           |                    |     |                          |                       | NM, NM (fatty)         |                       |                                  |                                |
| 64 | 44  | NML       |       |       |                 |        |         |                | W    |           |              |                         |                   |       |           |                    |     |                          |                       | NM                     |                       |                                  |                                |

**Table S1.** Characteristics of the 64 patients who donated tissue. Age at diagnosis, Diagnosis (IDC=invasive ductal carcinoma, ILC=invasive lobular carcinoma, MET=metaplastic carcinoma, INF=inflammatory carcinoma, MUC=mucinous carcinoma, NML=normal), Stage, grade and tumor size noted during gross histopathological examination, Number of positive lymph nodes out of all tested, BI-RADS mammography score (1=normal, 2=benign, 3= probably benign, 4= suspicious, 5=malignant), Breast Density score (0=fatty, 1=average, 2=dense, 3=very dense), Race (White, Black, Hispanic, Asian), Hormone receptor (estrogen and/or progesterone) and ERBB2 status, and the tissue(s) used (NI=normal ipsilateral, CA=invasive cancer, NC=normal contralateral, NM=normal from mammoplasty; fatty=20-50% fat). Progression-free survival (PFI) and survival given in months. NED=no evidence of disease. Empty cells: no information. It should be noted that the breast reduction population was 15 years younger than the breast cancer population.
