# Supplementary material for: Comparison of Breast Cancer to Healthy Control Tissue Discovers Novel Markers with Potential for Prognosis and Early Detection
Source: PubMed Central journal article supplement (PMC2817747; doi:10.1371/journal.pone.0009122), 2010-02-09
Supplement: pone.0009122.s005.pdf [file pone.0009122.s005.pdf]

| Pt | Tissue Classification | Histology                                                      | Grade | Of the prevailing cancer histology: |            |                          | Pt | Tissue Classification | Histology                                   | Grade | Of the prevailing cancer histology: |            |                          |
|----|-----------------------|----------------------------------------------------------------|-------|-------------------------------------|------------|--------------------------|----|-----------------------|---------------------------------------------|-------|-------------------------------------|------------|--------------------------|
|    |                       |                                                                |       | % Viable Tumor Cells                | % Necrosis | % Inflammatory Component |    |                       |                                             |       | % Viable Tumor Cells                | % Necrosis | % Inflammatory Component |
| 1  | NI                    | 100% normal                                                    |       |                                     |            |                          | 31 | NI                    | 100% normal                                 |       |                                     |            |                          |
| 2  | NI (fatty)            | 100% normal fibroadipose, no glands                            |       |                                     |            |                          | 32 | NI                    | 100% normal                                 |       |                                     |            |                          |
| 3  | CA                    | 100% invasive ductal carcinoma                                 | 2     | 10%                                 | 10%        | 3%                       | 33 | CA                    | 100% invasive mucinous carcinoma            | 1     | 5%                                  | 0%         | 0%                       |
| 4  | NI                    | 95% normal, 5% columnar cell change without atypia             |       |                                     |            |                          | 33 | NI                    | 100% normal                                 |       |                                     |            |                          |
| 5  | CA                    | 100% invasive ductal carcinoma                                 | 3     | 60%                                 | 0%         | 3%                       | 34 | NI (fatty)            | 100% adipose                                |       |                                     |            |                          |
| 5  | NI (fatty)            | 100% normal fibrofatty                                         |       |                                     |            | 0%                       | 35 | NI                    | 100% normal                                 |       |                                     |            |                          |
| 6  | CA                    | 60% invasive ductal carcinoma                                  | 3     | 15%                                 | 0%         | 10%                      | 36 | NI                    | 100% normal                                 |       |                                     |            |                          |
| 7  | NI                    | 100% fibroglandular tissue                                     |       |                                     |            |                          | 37 | NI                    | 100% breast parenchyma                      |       |                                     |            |                          |
| 8  | CA                    | 100% invasive ductal carcinoma                                 | 3     | 70%                                 | 5%         | 5%                       | 37 | NI                    | 100% breast parenchyma                      |       |                                     |            |                          |
| 8  | NI                    | 100% normal                                                    |       |                                     |            |                          | 38 | NC                    | 95% normal, 5% proliferation without atypia |       |                                     |            |                          |
| 9  | CA                    | 100% invasive lobular carcinoma                                | 2     | 10%                                 | 0%         | 0%                       | 38 | NC-M                  | 95% normal, 5% proliferation with atypia    |       |                                     |            |                          |
| 10 | CA                    | 100% invasive ductal carcinoma                                 | 2     | 15%                                 | 0%         | 1%                       | 39 | NI-A                  | 95% normal, 5% proliferation with atypia    |       |                                     |            |                          |
| 11 | NI                    | 98% normal, 2% Proliferation without atypia                    |       |                                     |            | 1%                       | 40 | CA                    | 100% invasive ductal carcinoma              | 3     | 30%                                 | 0%         | 2%                       |
| 12 | CA                    | 100% invasive ductal carcinoma                                 | 3     | 80%                                 | 20%        | 5%                       | 40 | NI                    | 100% normal                                 |       |                                     |            |                          |
| 12 | NI                    | 100% normal                                                    |       |                                     |            |                          | 41 | CA                    | 100% invasive ductal carcinoma              | 3     | 80%                                 | 0%         | 5%                       |
| 13 | CA                    | 80% invasive ductal carcinoma, 10% DCIS Cribriform, 10% normal | 1     | 15%                                 | 0%         | 0%                       | 42 | CA                    | 90% invasive ductal carcinoma, 10% normal   | 2     | 15%                                 | 0%         |                          |
| 13 | NI                    | 97% normal, 3% proliferation without atypia                    |       |                                     |            | 5%                       | 43 | CA                    | 100% invasive lobular carcinoma             | 2     | 7%                                  | 0%         | 15%                      |
| 14 | CA                    | 100% invasive ductal carcinoma                                 | 3     | 25%                                 | 1%         | 1%                       | 43 | CA                    | 100% invasive lobular carcinoma             | 2     | 15%                                 | 0%         | 2%                       |
| 14 | NI                    | 100% normal                                                    |       |                                     |            |                          | 43 | NI                    | 95% normal, 5% proliferation without atypia |       |                                     |            |                          |
| 15 | NI (fatty)            | 100% adipose                                                   |       |                                     |            |                          | 44 | NI (fatty)            | 100% fibroadenoma                           |       |                                     |            | 5%                       |
| 16 | CA                    | 90% invasive ductal carcinoma, 10% normal                      | 2     | 15%                                 | 0%         | 2%                       | 45 | NM                    | 100% normal                                 |       |                                     |            |                          |
| 16 | NI                    | 100% fibroglandular                                            |       |                                     |            |                          | 46 | NM                    | 100% normal                                 |       |                                     |            |                          |
| 16 | NC (fatty)            | 100% adipose                                                   |       |                                     |            |                          | 47 | NM                    | 100% normal                                 |       |                                     |            |                          |
| 17 | CA                    | 90% invasive ductal carcinoma, 10% normal                      | 3     | 70%                                 | 0%         | 5%                       | 48 | NM                    | 100% normal                                 |       |                                     |            |                          |
| 17 | NI (fatty)            | 100% adipose                                                   |       |                                     |            |                          | 49 | NM                    | 100% normal                                 |       |                                     |            |                          |
| 18 | CA                    | 95% invasive mixed ductal/lobular carcinoma, 5% normal         | 2     | 15%                                 | 0%         | 2%                       | 50 | NM                    | 100% normal                                 |       |                                     |            |                          |
| 18 | NI                    | 100% fibroglandular                                            |       |                                     |            |                          | 51 | NM                    | 100% normal                                 |       |                                     |            |                          |
| 19 | NI (fatty)            | 100% adipose                                                   |       |                                     |            |                          | 52 | NM                    | 100% normal                                 |       |                                     |            |                          |
| 20 | CA                    | 80% invasive ductal carcinoma, 20% normal                      | 2     | 30%                                 | 0%         | 5%                       | 53 | NM                    | 100% normal                                 |       |                                     |            |                          |
| 20 | NI                    | 100% normal                                                    |       |                                     |            |                          | 54 | NM                    | 100% normal                                 |       |                                     |            |                          |
| 21 | CA                    | 100% invasive ductal carcinoma                                 | 2     | 30%                                 | 0%         | 5%                       | 55 | NM                    | 100% normal                                 |       |                                     |            |                          |
| 21 | NI (fatty)            | 100% normal                                                    |       |                                     |            |                          | 56 | NM (fatty)            | 100% fibroadipose                           |       |                                     |            |                          |
| 22 | NI (fatty)            | 100% fibroadipose                                              |       |                                     |            |                          | 56 | NM (fatty)            | 100% fibroadipose                           |       |                                     |            |                          |
| 23 | NI                    | 100% normal                                                    |       |                                     |            |                          | 57 | NM                    | 100% normal                                 |       |                                     |            |                          |
| 24 | CA                    | 95% invasive metaplastic carcinoma, 5% normal                  | 3     | 15%                                 | 0%         | 5%                       | 58 | NM                    | 100% normal                                 |       |                                     |            |                          |
| 24 | NI (fatty)            | 100% fibroadipose                                              |       |                                     |            |                          | 58 | NM (fatty)            | 100% fibroadipose                           |       |                                     |            |                          |
| 25 | NI                    | 95% normal, 5% proliferation without atypia                    |       |                                     |            |                          | 59 | NM                    | 100% normal                                 |       |                                     |            |                          |
| 26 | CA                    | 100% invasive lobular carcinoma                                |       | 95%                                 | 0%         | 0%                       | 59 | NM (fatty)            | 100% fibroadipose                           |       |                                     |            |                          |
| 26 | NI                    | 100% normal                                                    |       |                                     |            |                          | 60 | NM (fatty)            | 100% fibroadipose                           |       |                                     |            |                          |
| 27 | CA                    | 80% invasive lobular carcinoma, 20% normal                     | 1     | 70%                                 | 0%         | 5%                       | 61 | NM (fatty)            | 100% fibroadipose                           |       |                                     |            |                          |
| 27 | NI                    | 100% normal                                                    |       |                                     |            |                          | 61 | NM (fatty)            | 100% fibroadipose                           |       |                                     |            |                          |
| 28 | NI                    | 100% normal                                                    |       |                                     |            |                          | 62 | NM                    | 100% normal                                 |       |                                     |            |                          |
| 29 | NI (fatty)            | 100% adipose                                                   |       |                                     |            |                          | 63 | NM                    | 100% normal                                 |       |                                     |            |                          |
| 30 | CA                    | 100% invasive ductal carcinoma                                 | 2     | 15%                                 | 0%         | 1%                       | 63 | NM (fatty)            | 100% fibroadipose                           |       |                                     |            |                          |
| 31 | NI                    | 100% normal                                                    |       |                                     |            |                          | 64 | NM                    | 100% normal                                 |       |                                     |            |                          |

**Table S2.** Tissue Characteristics. Histopathological examination was performed on the tissue piece adjacent to the one used for RNA extraction. Patient numbers in the first column match those in table S1. Tissue classification is explained in table S1. In the case of tumor tissue, the histology lists the percentage of the tissue specimen that was involved by tumor. The percentage of viable tumor cells, necrosis and the inflammatory component within the tumor histology is listed in the last three columns. These numbers don't add up to 100% as we did not record the percentage of fibrous or fatty tissue. However, we limited collection of all tissues to those with less than 60% fat. Please note that tumor grade of an individual tissue piece might differ from the grade of the entire tumor listed in table S1.
