# Supplementary material for: Comparison of Breast Cancer to Healthy Control Tissue Discovers Novel Markers with Potential for Prognosis and Early Detection
Source: PubMed Central journal article supplement (PMC2817747; doi:10.1371/journal.pone.0009122), 2010-02-09
Supplement: pone.0009122.s006.pdf [file pone.0009122.s006.pdf]

| Gene Symbol | Cancers | Con-<br>trols | Re-<br>sult | Gene Symbol | Can-<br>cers | Con-<br>trols | Re-<br>sult | Gene Symbol | Can-<br>cers | Con-<br>trols | Result |
|-------------|---------|---------------|-------------|-------------|--------------|---------------|-------------|-------------|--------------|---------------|--------|
| ADAM12*     | 4%      | 0%            |             | EPOR        | 36%          | 0%            | ∇           | PEBP1       | 56%          | 0%            | ∇      |
| AGR2*       | 16%     | 4%            |             | ERBB2       |              |               |             | PEBP4       | 0%           | 0%            |        |
| AKT1        | 0%      | 4%            |             | ERBB3*      | 4%           | 0%            |             | PGR         | 36%          | 0%            | ∇      |
| AMBP*       | 0%      | 0%            |             | ERBB4       | 44%          | 0%            | ∇           | PIK3CA      | 12%          | 0%            |        |
| ANGPT2*     | 44%     | 0%            | ∇           | ESR1        | 28%          | 4%            | Δ           | PIP         | 0%           | 0%            |        |
| APOL1*      | 24%     | 0%            | ∇           | ETAA1*      | 52%          | 0%            | ∇           | PLAUR       | 36%          | 0%            | Δ      |
| AR          | 48%     | 0%            | ∇           | FGFR2*      | 20%          | 0%            | ∇           | PRL         |              |               |        |
| ASPN*       | 36%     | 4%            | Δ           | FN1*        | 56%          | 0%            | Δ           | PRLR*       | 8%           | 0%            |        |
| BGN*        | 32%     | 4%            | Δ           | FOXA1       | 28%          | 0%            | Δ           | PROCR       | 88%          | 0%            | ∇      |
| BIRC5       | 28%     | 4%            | Δ           | GATA3       | 32%          | 0%            | Δ           | PSMA5*      | 4%           | 0%            |        |
| BRCA1       |         |               |             | GDF15       | 12%          | 4%            |             | PTPN1*      | 8%           | 0%            |        |
| BRCA2       | 4%      | 4%            |             | HOXB7       | 20%          | 0%            | ∇           | PVRL4       | 0%           | 0%            |        |
| BRMS1       | 8%      | 0%            |             | IFIT1*      | 4%           | 0%            |             | S100A7      | 56%          | 8%            | Δ      |
| BUB1        | 72%     | 0%            | Δ           | IGF2        | 8%           | 0%            |             | S100B*      | 60%          | 0%            | ∇      |
| C18orf8*    | 4%      | 0%            |             | KLK3        |              |               |             | SCGB2A1     | 4%           | 4%            |        |
| CALB2       | 0%      | 0%            |             | KRT20       | 0%           | 4%            |             | SCUBE2*     | 52%          | 0%            | ∇      |
| CAV1        | 84%     | 0%            | ∇           | KRT7        | 0%           | 0%            |             | SDC1        | 16%          | 0%            |        |
| CCNE1       | 28%     | 0%            | Δ           | LCN2        | 0%           | 0%            |             | SFRP1       | 76%          | 0%            | ∇      |
| CD274       | 24%     | 0%            | Δ           | LETMD1      | 84%          | 0%            | ∇           | SFRP2*      | 4%           | 0%            |        |
| CD44        | 20%     | 0%            | ∇           | LPAR3       | 4%           | 4%            |             | SNIP        | 16%          | 8%            |        |
| CDH1        | 0%      | 0%            |             | LRRC15*     | 68%          | 0%            | Δ           | SPARC       | 52%          | 0%            | ∇      |
| CDKN1B*     | 28%     | 0%            | ∇           | LTF*        | 4%           | 0%            |             | SPP1        | 32%          | 0%            | Δ      |
| CDX2        | 0%      | 4%            |             | LYZ*        | 12%          | 4%            |             | STC2*       | 0%           | 0%            |        |
| CFB*        | 24%     | 0%            | Δ           | MGST1       | 48%          | 0%            | ∇           | SUMF2*      | 0%           | 0%            |        |
| COL11A1*    | 60%     | 4%            | Δ           | MIF         | 8%           | 0%            |             | THBS2       | 4%           | 0%            |        |
| COL1A1*     | 68%     | 0%            | Δ           | MMP1        | 56%          | 4%            | Δ           | TIMP1       | 24%          | 0%            | Δ      |
| COL1A2*     | 40%     | 4%            | Δ           | MMP10       | 32%          | 4%            | Δ           | TIMP2       | 48%          | 0%            | ∇      |
| COL3A1*     | 0%      | 0%            |             | MMP11       | 68%          | 4%            | Δ           | TIMP3       | 72%          | 0%            | ∇      |
| COL5A1*     | 20%     | 0%            | Δ           | MMP12       | 56%          | 4%            | Δ           | TIMP4       | 68%          | 0%            | ∇      |
| COL5A2*     | 28%     | 0%            | ∇           | MMP13       | 60%          | 0%            | Δ           | TK1         | 36%          | 0%            | Δ      |
| COL6A3*     | 12%     | 0%            |             | MMP14       | 4%           | 0%            |             | TM9SF2*     | 16%          | 0%            |        |
| COL8A1*     | 16%     | 0%            |             | MMP16       | 0%           | 4%            |             | TNFRSF10B   | 20%          | 0%            | ∇      |
| COMP*       | 64%     | 0%            | Δ           | MMP17       |              |               |             | TNN         | 88%          | 0%            | ∇      |
| CSNK2A1     | 16%     | 0%            |             | MMP2        | 24%          | 0%            | ∇           | TOP2A       | 52%          | 0%            | Δ      |
| CTGF        | 20%     | 0%            | ∇           | MMP20       | 12%          | 0%            |             | TP53        | 8%           | 0%            |        |
| CTHRC1*     | 48%     | 0%            | Δ           | MMP3        | 12%          | 4%            |             | TRPS1       | 0%           | 0%            |        |
| GXCL1       |         |               |             | MMP7        | 20%          | 4%            | ∇           | TTF1        | 8%           | 4%            |        |
| CYP4B1*     | 40%     | 0%            | ∇           | MMP8        | 8%           | 0%            |             | VCAN*       | 40%          | 0%            | Δ      |
| CYR61       | 36%     | 0%            | ∇           | MMP9        | 16%          | 0%            |             | VEGFA       | 0%           | 0%            |        |
| DGD*        |         |               |             | MSLN        | 16%          | 4%            |             | VTCN1       | 0%           | 0%            |        |
| DEFA1       | 0%      | 0%            |             | MUC1        | 44%          | 4%            | Δ           | WFDC2       | 20%          | 4%            | Δ      |
| DEFA3       | 0%      | 0%            |             | MYBL2*      |              |               |             | WT1         | 48%          | 4%            | Δ      |
| ECM1*       | 4%      | 4%            |             | NES         | 36%          | 0%            | ∇           | XBP1        | 4%           | 0%            |        |
| EGFR        | 72%     | 0%            | ∇           | OAS1*       | 20%          | 0%            |             | YWHAZ       | 12%          | 0%            |        |
| EPO         | 8%      | 0%            |             | OAS2*       | 16%          | 0%            | Δ           |             |              |               |        |

**Table S3:** List of the 134 genes (by gene symbol) found by mining of expression data and/or LevelsDB mining (asterisk). References are listed in the Supplement. The 8 genes for which PCR was inconclusive are struck through. Thresholds for the cancers and controls were determined by the expression in the 28 normal mammaplasty tissues as mean +3 SD for genes with over-expression in the cancers and as below the minimum for genes with under-expression in the cancers. These cutoff values lie well above the gene expression variability in normal breast tissues listed in Table 1. Columns 2 and 3 list the percent of cancer or control tissues above or below this threshold. Result column: over- (Δ) or under- (∇) expression in cancer tissue for genes with  $\geq 20\%$  of the cancers and  $\leq 5\%$  of the controls above or below threshold.
