# Supplementary material for: Comparison of Breast Cancer to Healthy Control Tissue Discovers Novel Markers with Potential for Prognosis and Early Detection
Source: PubMed Central journal article supplement (PMC2817747; doi:10.1371/journal.pone.0009122), 2010-02-09
Supplement: pone.0009122.s007.pdf [file pone.0009122.s007.pdf]

| Tissue  | AKT1 |     | AR  |     | BIRC5 |      | BRCA1 |     | BRCA2 |     | BUB1 |     | CAV1 |      | CCNE1 |     | CD44 |     | DDH1 |     | CDKN1B |     | COL1A1 |     | CYR81 |     | EGFR |     | ERBB3 |     | ERBB4 |     | ESR1 |     | FN1 |     | GDF15 |     | IGF2 |     | LCN2 |      |     |
|---------|------|-----|-----|-----|-------|------|-------|-----|-------|-----|------|-----|------|------|-------|-----|------|-----|------|-----|--------|-----|--------|-----|-------|-----|------|-----|-------|-----|-------|-----|------|-----|-----|-----|-------|-----|------|-----|------|------|-----|
|         | TOR  | BT  | TOR | BT  | TOR   | BT   | TOR   | BT  | TOR   | BT  | TOR  | BT  | TOR  | BT   | TOR   | BT  | TOR  | BT  | TOR  | BT  | TOR    | BT  | TOR    | BT  | TOR   | BT  | TOR  | BT  | TOR   | BT  | TOR   | BT  | TOR  | BT  | TOR | BT  | TOR   | BT  | TOR  | BT  |      |      |     |
| P03 T03 | 0.7  | 1.0 | 1.6 | 1.4 | 0.7   | 0.2  | 0.6   | 1.4 | 0.7   | 0.9 | 0.5  | 0.7 | 0.3  | 0.8  | 0.7   | 0.6 | 1.0  | 1.2 | 1.3  | 2.0 | 1.2    | 1.3 | 3.7    | 1.9 | 0.4   | 0.8 | 0.3  | 0.4 | 1.6   | 1.3 | 0.5   | 0.7 | 5.7  | 9.4 | 3.6 | 4.1 | 2.3   | 4.2 | 0.5  | 0.3 | 0.7  | 1.2  |     |
| P05 T05 | 0.7  | 0.9 | 0.0 | 0.1 | 31.3  | 9.5  | 0.6   | 0.7 | 1.7   | 1.3 | 5.5  | 4.7 | 0.4  | 0.4  | 9.9   | 5.9 | 0.8  | 0.8 | 1.0  | 1.4 | 0.8    | 0.9 | 0.0    | 0.5 | 0.3   | 0.4 | 1.1  | 0.9 | 1.2   | 0.9 | 0.0   | 0.0 | 0.1  | 0.0 | 0.8 | 0.9 | 0.9   | 0.2 | 0.5  | 0.1 | 0.8  | 12.7 |     |
| P09 T11 | 0.9  | 1.0 | 1.3 | 1.4 | 1.6   | 1.9  | 2.2   | 1.7 | 1.9   | 1.9 | 1.3  | 1.2 | 1.0  | 0.9  | 1.0   | 0.7 | 1.3  | 1.1 | 1.3  | 1.4 | 1.3    | 1.7 | 0.0    | 1.6 | 1.0   | 0.6 | 0.8  | 0.9 | 1.2   | 2.2 | 3.5   | 4.3 | 3.6  | 7.4 | 1.3 | 0.8 | 0.0   | 1.8 | 2.2  | 1.3 | 0.0  | 1.6  |     |
| P10 T16 | 1.1  | 0.7 | 1.2 | 0.9 | 0.9   | 0.1  | 0.4   | 0.3 | 1.2   | 0.6 | 1.3  | 0.8 | 0.4  | 0.3  | 0.6   | 0.5 | 0.4  | 0.3 | 1.5  | 1.6 | 1.4    | 0.9 | 0.0    | 1.7 | 0.6   | 0.4 | 0.4  | 0.3 | 1.6   | 1.0 | 2.4   | 1.7 | 2.4  | 2.1 | 4.5 | 2.4 | 2.7   | 2.6 | 0.6  | 0.4 | 1.0  | 0.8  |     |
| P14 T18 | 1.6  | 1.3 | 0.2 | 0.6 | 2.2   | 8.4  | 1.7   | 1.1 | 0.4   | 1.4 | 2.1  | 1.7 | 0.4  | 0.6  | 0.8   | 0.8 | 0.6  | 0.7 | 1.8  | 1.9 | 0.6    | 0.8 | 10.6   | 2.7 | 1.7   | 1.6 | 0.3  | 0.3 | 0.6   | 1.0 | 0.4   | 0.6 | 1.1  | 5.9 | 6.2 | 4.8 | 0.0   | 0.6 | 1.4  | 0.2 | 0.5  | 1.0  |     |
| P19 T22 | 1.3  | 1.9 | 0.8 | 0.9 | 3.2   | 11.2 | 1.2   | 2.3 | 0.8   | 1.2 | 0.9  | 1.9 | 1.4  | 2.0  | 1.7   | 1.1 | 0.7  | 0.5 | 0.9  | 1.1 | 1.1    | 1.2 | 0.0    | 0.7 | 0.6   | 0.7 | 0.5  | 0.9 | 0.8   | 1.1 | 4.9   | 4.2 | 4.1  | 6.1 | 0.9 | 1.1 | 0.0   | 0.9 | 0.9  | 1.8 | 1.3  |      |     |
| P17 T24 | 1.7  | 1.9 | 0.2 | 0.8 | 33.5  | 25.3 | 2.1   | 3.4 | 0.9   | 1.4 | 2.9  | 3.5 | 0.5  | 0.5  | 4.4   | 3.1 | 0.3  | 0.2 | 1.0  | 1.0 | 1.1    | 0.9 | 0.0    | 0.5 | 0.1   | 0.1 | 0.3  | 0.2 | 1.1   | 1.0 | 1.0   | 7.6 | 12.9 | 3.1 | 1.0 | 1.0 | 1.4   | 0.8 | 0.2  | 0.0 | 5.0  |      |     |
| P20 T29 | 1.3  | 1.1 | 1.1 | 1.5 | 2.4   | 9.3  | 1.3   | 1.0 | 2.2   | 3.1 | 1.8  | 1.8 | 0.6  | 0.6  | 1.0   | 1.9 | 0.6  | 0.8 | 1.3  | 1.7 | 0.5    | 0.7 | 0.0    | 1.1 | 1.2   | 1.1 | 0.9  | 0.7 | 0.4   | 0.6 | 0.5   | 0.9 | 0.2  | 0.2 | 1.9 | 1.4 | 0.0   | 3.4 | 0.8  | 0.2 | 0.3  | 0.7  |     |
| P21 T31 | 4.1  | 1.5 | 0.5 | 1.3 | 8.9   | 0.2  | 2.0   | 1.8 | 0.8   | 1.1 | 1.7  | 1.7 | 0.1  | 0.3  | 2.0   | 1.2 | 0.7  | 0.5 | 1.3  | 0.8 | 1.1    | 1.0 | 2.4    | 0.5 | 0.4   | 0.5 | 0.2  | 0.1 | 2.6   | 2.1 | 0.9   | 0.5 | 1.0  | 2.9 | 1.2 | 1.2 | 1.4   | 0.5 | 0.5  | 0.1 | 1.9  | 2.2  |     |
| P27 T40 | 0.9  | 1.1 | 1.6 | 2.1 | 0.0   | 0.5  | 1.9   | 2.0 | 1.5   | 0.1 | 0.8  | 1.5 | 1.0  | 1.1  | 0.7   | 0.9 | 1.1  | 1.2 | 0.7  | 0.7 | 0.6    | 0.7 | 3.9    | 3.0 | 1.2   | 1.2 | 1.0  | 1.1 | 1.0   | 2.2 | 3.9   | 5.7 | 3.4  | 6.3 | 2.2 | 2.2 | 0.0   | 0.7 | 1.4  | 1.1 | 2.0  | 1.0  |     |
| P30 T44 | 1.0  | 0.8 | 0.7 | 0.9 | 5.0   | 0.3  | 1.1   | 0.8 | 0.0   | 5.3 | 1.4  | 1.2 | 0.4  | 0.0  | 2.5   | 1.9 | 1.9  | 1.6 | 0.9  | 0.5 | 0.7    | 0.9 | 0.0    | 0.0 | 0.8   | 0.8 | 1.7  | 2.4 | 0.5   | 0.8 | 0.3   | 0.1 | 0.1  | 0.3 | 1.2 | 3.2 | 0.0   | 3.1 | 2.3  | 0.3 | 10.8 | 0.0  |     |
| P41 T60 | 0.9  | 0.9 | 2.6 | 1.6 | 7.4   | 9.3  | 0.9   | 0.8 | 0.9   | 1.1 | 2.0  | 2.4 | 0.2  | 0.5  | 2.8   | 2.4 | 0.7  | 0.6 | 1.5  | 1.9 | 0.7    | 0.8 | 0.0    | 0.6 | 0.5   | 0.8 | 0.7  | 0.8 | 1.0   | 0.9 | 0.0   | 0.6 | 0.1  | 0.1 | 3.3 | 3.5 | 1.4   | 0.1 | 6.8  | 0.1 | 2.0  | 2.0  |     |
| P43 T63 | 1.5  | 1.0 | 1.5 | 1.6 | 7.4   | 11.1 | 1.5   | 1.5 | 0.8   | 0.1 | 1.3  | 1.7 | 0.9  | 1.2  | 0.7   | 0.6 | 1.4  | 1.1 | 0.4  | 0.4 | 1.6    | 1.7 | 0.0    | 1.4 | 0.8   | 1.1 | 0.8  | 0.4 | 1.7   | 2.2 | 1.2   | 2.2 | 4.3  | 4.0 | 0.7 | 1.2 | 8.3   | 0.8 | 1.0  | 1.0 | 0.9  |      |     |
| P49 T70 | 0.7  | 0.8 | 1.3 | 1.1 | 0.0   | 0.6  | 0.6   | 1.1 | 0.1   | 0.2 | 0.0  | 0.7 | 7.9  | 7.1  | 0.4   | 0.9 | 1.4  | 1.2 | 0.2  | 0.1 | 0.9    | 0.8 | 1.0    | 0.0 | 0.5   | 1.9 | 1.7  | 1.6 | 1.3   | 0.1 | 0.3   | 0.7 | 0.6  | 0.5 | 0.6 | 0.6 | 0.3   | 0.0 | 0.3  | 2.3 | 1.0  | 0.8  | 1.2 |
| P52 T73 | 1.0  | 1.6 | 0.9 | 1.4 | 0.5   | 1.2  | 0.3   | 0.9 | 0.8   | 0.2 | 0.2  | 0.0 | 7.3  | 8.8  | 0.6   | 1.3 | 0.6  | 0.8 | 0.0  | 0.0 | 0.6    | 1.0 | 0.0    | 0.4 | 1.9   | 1.7 | 1.6  | 3.2 | 0.0   | 0.0 | 1.0   | 1.5 | 0.2  | 1.1 | 0.4 | 0.5 | 0.0   | 0.3 | 2.4  | 2.5 | 0.1  | 0.0  |     |
| P54 T75 | 0.8  | 1.0 | 0.5 | 0.8 | 1.1   | 0.6  | 0.8   | 1.0 | 1.2   | 1.7 | 1.1  | 0.6 | 2.9  | 2.7  | 1.0   | 0.6 | 1.2  | 1.0 | 1.5  | 1.0 | 1.3    | 1.0 | 0.0    | 1.6 | 4.9   | 4.2 | 1.4  | 2.5 | 1.3   | 1.3 | 2.5   | 1.9 | 0.4  | 0.5 | 0.5 | 0.5 | 0.0   | 0.3 | 1.1  | 1.1 | 1.0  | 0.8  |     |
| P58 T77 | 0.7  | 1.2 | 1.1 | 1.2 | 0.3   | 0.7  | 0.7   | 1.4 | 0.8   | 0.1 | 0.1  | 0.3 | 11.4 | 10.0 | 1.5   | 1.6 | 0.7  | 0.9 | 0.3  | 0.2 | 1.0    | 1.3 | 0.0    | 0.3 | 3.3   | 2.9 | 2.1  | 3.6 | 0.1   | 0.3 | 0.6   | 0.5 | 0.6  | 0.9 | 0.2 | 0.3 | 0.0   | 0.3 | 1.2  | 1.4 | 0.4  | 0.0  |     |
| P59 T82 | 1.4  | 1.0 | 1.5 | 1.2 | 0.2   | 0.5  | 1.1   | 0.6 | 1.1   | 0.1 | 0.1  | 0.2 | 2.8  | 2.9  | 0.5   | 0.8 | 1.0  | 1.0 | 1.6  | 2.7 | 1.0    | 1.4 | 0.0    | 0.4 | 1.0   | 1.3 | 1.0  | 1.8 | 0.6   | 1.2 | 2.2   | 3.9 | 2.8  | 2.0 | 0.3 | 0.5 | 0.0   | 0.4 | 0.8  | 2.0 | 0.9  | 0.9  |     |
| P60 T84 | 1.0  | 0.8 | 1.6 | 1.4 | 0.0   | 0.7  | 0.6   | 0.9 | 0.6   | 0.1 | 0.1  | 0.3 | 9.6  | 7.0  | 0.5   | 0.6 | 1.1  | 1.5 | 0.0  | 0.2 | 1.0    | 1.2 | 0.0    | 0.7 | 2.0   | 2.8 | 1.7  | 2.5 | 0.0   | 0.1 | 0.5   | 0.6 | 1.0  | 0.6 | 1.0 | 0.0 | 0.3   | 0.9 | 1.0  | 0.2 | 0.7  |      |     |
| P62 T88 | 0.7  | 0.8 | 0.7 | 0.0 | 0.6   | 0.5  | 0.7   | 0.1 | 0.1   | 0.2 | 0.1  | 0.2 | 9.1  | 7.6  | 0.6   | 1.2 | 1.0  | 1.3 | 0.3  | 0.4 | 0.7    | 1.0 | 0.0    | 0.5 | 3.7   | 4.7 | 2.7  | 4.0 | 0.2   | 0.5 | 1.1   | 0.8 | 0.6  | 0.6 | 0.8 | 0.7 | 0.0   | 0.2 | 1.2  | 1.3 | 1.0  | 0.8  |     |
| P63 T91 | 0.6  | 0.8 | 0.6 | 0.7 | 0.3   | 0.5  | 0.7   | 0.9 | 1.9   | 0.1 | 0.4  | 0.2 | 3.1  | 1.1  | 0.5   | 1.1 | 1.0  | 1.3 | 1.0  | 1.3 | 1.2    | 0.0 | 0.3    | 3.1 | 3.0   | 2.4 | 2.1  | 1.2 | 1.0   | 2.9 | 2.1   | 1.1 | 0.9  | 1.0 | 0.3 | 0.0 | 0.3   | 1.2 | 1.1  | 8.9 | 9.3  |      |     |
| P62 T89 | 1.4  | 0.9 | 0.3 | 0.8 | 0.3   | 0.3  | 0.7   | 0.9 | 0.7   | 1.9 | 0.4  | 0.3 | 3.9  | 4.0  | 0.7   | 1.1 | 1.5  | 1.1 | 1.0  | 0.8 | 1.1    | 1.3 | 0.2    | 0.2 | 3.9   | 3.4 | 2.3  | 3.8 | 0.5   | 1.0 | 1.3   | 1.2 | 0.6  | 0.7 | 0.3 | 0.4 | 0.0   | 0.6 | 1.0  | 1.5 | 1.7  | 1.6  |     |

| Tissue  | LTF |     | MGS1 |     | MMP1 |      | MMP11 |     | MMP14 |     | MMP17 |     | MMP2 |     | MMP9 |     | MUC1 |     | MYBL2 |      | PGR |     | PKNOX1 |     | SCUBE2 |     | TIMP1 |     | TIMP3 |     | TK1 |     | TNFRSF10B |     | VEGFA |     | WT1 |      | YWHAZ |     |
|---------|-----|-----|------|-----|------|------|-------|-----|-------|-----|-------|-----|------|-----|------|-----|------|-----|-------|------|-----|-----|--------|-----|--------|-----|-------|-----|-------|-----|-----|-----|-----------|-----|-------|-----|-----|------|-------|-----|
|         | TOR | BT  | TOR  | BT  | TOR  | BT   | TOR   | BT  | TOR   | BT  | TOR   | BT  | TOR  | BT  | TOR  | BT  | TOR  | BT  | TOR   | BT   | TOR | BT  | TOR    | BT  | TOR    | BT  | TOR   | BT  | TOR   | BT  | TOR | BT  | TOR       | BT  | TOR   | BT  | TOR | BT   | TOR   | BT  |
| P03 T03 | 1.0 | 1.5 | 0.2  | 0.2 | 3.6  | 12.1 | 0.8   | 4.6 | 0.5   | 3.4 | 0.7   | 1.2 | 0.9  | 1.1 | 0.6  | 1.4 | 2.0  | 3.9 | 0.3   | 0.5  | 3.8 | 3.0 | 0.8    | 1.6 | 0.7    | 1.3 | 0.6   | 1.5 | 0.9   | 1.0 | 1.1 | 0.9 | 0.9       | 1.3 | 0.7   | 0.8 | 2.8 | 5.1  | 0.6   | 1.0 |
| P05 T05 | 0.5 | 0.4 | 1.0  | 1.2 | 2.7  | 4.7  | 0.6   | 0.5 | 0.4   | 0.4 | 0.4   | 0.4 | 0.3  | 0.4 | 0.9  | 2.1 | 0.6  | 0.6 | 3.1   | 6.6  | 0.1 | 0.3 | 0.9    | 0.8 | 0.1    | 0.1 | 0.7   | 1.1 | 0.3   | 0.0 | 3.1 | 1.9 | 0.5       | 0.6 | 0.5   | 0.8 | 7.9 | 11.8 | 1.3   | 1.6 |
| P09 T11 | 0.8 | 0.9 | 1.0  | 0.5 | 0.6  | 1.2  | 0.0   | 1.3 | 1.4   | 1.5 | 0.0   | 0.1 | 1.2  | 1.1 | 1.0  | 1.0 | 2.9  | 4.1 | 1.8   | 1.8  | 5.0 | 3.3 | 0.0    | 1.4 | 3.3    | 7.0 | 2.1   | 2.4 | 1.3   | 0.1 | 7.9 | 1.7 | 1.4       | 1.1 | 0.2   | 1.0 | 6.5 | 3.4  | 1.1   | 0.9 |
| P10 T16 | 0.3 | 0.2 | 0.2  | 0.3 | 0.6  | 0.6  | 1.2   | 1.8 | 1.3   | 2.0 | 1.3   | 1.0 | 1.6  | 1.2 | 1.5  | 1.1 | 1.8  | 2.7 | 1.2   | 0.7  | 2.7 | 1.7 | 1.2    | 0.4 | 1.3    | 1.6 | 1.2   | 1.2 | 0.8   | 0.5 | 0.4 | 0.6 | 1.5       | 1.3 | 1.2   | 0.8 | 3.0 | 2.6  | 0.8   | 0.8 |
| P14 T18 | 0.1 | 0.1 | 0.1  | 0.1 | 2.9  | 7.9  | 2.7   | 7.8 | 1.7   | 6.5 | 1.2   | 2.4 | 1.5  | 1.7 | 4.0  | 8.9 | 1.7  | 2.5 | 1.3   | 3.3  | 2.7 | 0.0 | 0.9    | 0.0 | 0.4    | 0.8 | 1.1   | 1.7 | 1.4   | 0.3 | 0.1 | 1.9 | 0.5       | 0.4 | 1.2   | 1.6 | 7.4 | 5.9  | 1.3   | 1.6 |
| P16 T22 | 1.9 | 1.9 | 1.6  | 1.1 | 1.7  | 1.1  | 0.3   | 1.6 | 0.8   | 1.8 | 0.9   | 1.2 | 0.9  | 0.9 | 1.0  | 1.0 | 1.6  | 4.0 | 1.6   | 2.9  | 2.9 | 2.0 | 0.8    | 0.8 | 2.3    | 5.4 | 1.2   | 1.5 | 1.0   | 2.5 | 1.4 | 1.8 | 1.0       | 1.0 | 1.0   | 0.9 | 0.6 | 0.1  | 1.4   | 1.7 |
| P17 T24 | 0.0 | 0.0 | 0.0  | 0.0 | 1.7  | 2.4  | 1.2   | 2.0 | 0.6   | 1.8 | 0.7   | 0.6 | 0.4  | 0.3 | 2.4  | 4.7 | 0.1  | 0.1 | 6.1   | 10.9 | 0.4 | 0.4 | 0.8    |     |        |     |       |     |       |     |     |     |           |     |       |     |     |      |       |     |
