# Supplementary material for: Comparison of Breast Cancer to Healthy Control Tissue Discovers Novel Markers with Potential for Prognosis and Early Detection
Source: PubMed Central journal article supplement (PMC2817747; doi:10.1371/journal.pone.0009122), 2010-02-09
Supplement: pone.0009122.s011.pdf [file pone.0009122.s011.pdf]

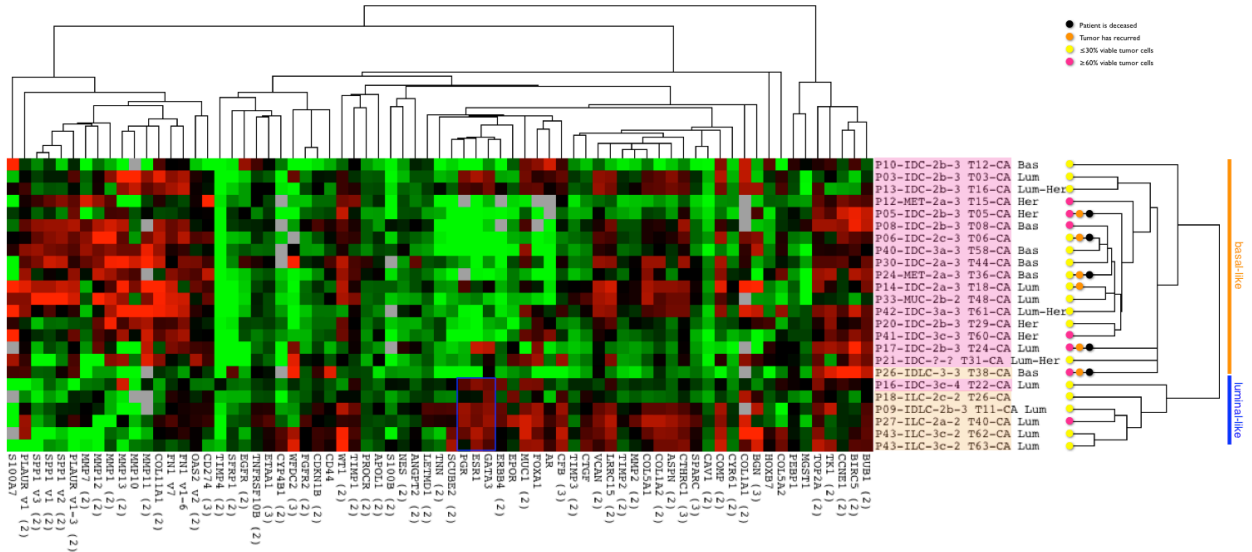

**Figure S2:** Unsupervised cluster analysis of the 24 invasive cancer tissues (7 tissues with  $\geq 60\%$  and 17 with  $\leq 30\%$  viable tumor cells) using the 67 genes that discriminate between invasive tissues and mammaplasty normal tissues. No cluster formation is observed based on tumor cell content. The two clusters that are formed separate the cancers by outcome.
