# Supplementary material for: Comparison of Breast Cancer to Healthy Control Tissue Discovers Novel Markers with Potential for Prognosis and Early Detection
Source: PLoS One. 2010 Feb 9;5(2):e9122. doi: 10.1371/journal.pone.0009122 (PMC2817747; doi:10.1371/journal.pone.0009122)
Supplement: Table S5 — Percent CV values of original and unfiltered OpenArray PCR results. Percent CV values for all tissues (%CV a) and for only those tissues with outliers were removed from the OpenArray results (%CV b). Removal was acceptable because the OpenArray PCR was not duplicated like the original PCR and had a higher number of values close or below the PCRÊ¼s detection limit. (0.04 MB PDF) [file pone.0009122.s008.pdf]

| Symbol | %CV (a) | %CV (b) | Symbol    | %CV (a) | %CV (b) |
|--------|---------|---------|-----------|---------|---------|
| AKT1   | 21%     | 21%     | LTF       | 36%     | 31%     |
| AR     | 32%     | 32%     | MGST1     | 26%     | 21%     |
| BIRC5  | 74%     | 60%     | MMP1      | 80%     | 60%     |
| BRCA1  | 23%     | 23%     | MMP11     | 97%     | 65%     |
| BRCA2  | 71%     | 67%     | MMP14     | 73%     | 71%     |
| BUB1   | 42%     | 42%     | MMP17     | 82%     | 52%     |
| CAV1   | 29%     | 19%     | MMP2      | 14%     | 14%     |
| CCNE1  | 32%     | 32%     | MMP9      | 36%     | 36%     |
| CD44   | 20%     | 20%     | MUC1      | 25%     | 25%     |
| CDH1   | 26%     | 26%     | MYBL2     | 65%     | 45%     |
| CDKN1B | 19%     | 19%     | PGR       | 69%     | 69%     |
| COL1A1 | 125%    | 64%     | PIK3CA    | 46%     | 37%     |
| CYR61  | 15%     | 15%     | SCUBE2    | 36%     | 36%     |
| EGFR   | 34%     | 34%     | TIMP1     | 20%     | 20%     |
| ERBB3  | 40%     | 36%     | TIMP3     | 65%     | 65%     |
| ERBB4  | 33%     | 33%     | TK1       | 67%     | 52%     |
| ESR1   | 45%     | 45%     | TNFRSF10B | 12%     | 12%     |
| FN1    | 34%     | 34%     | VEGFA     | 28%     | 23%     |
| GDF15  | 114%    | 68%     | WT1       | 69%     | 45%     |
| IGF2   | 45%     | 45%     | YWHAZ     | 16%     | 16%     |
| LCN2   | 47%     | 34%     |           |         |         |

**Table S5:** Percent CV values of original and unfiltered OpenArray PCR results. Percent CV values for all tissues (%CV a) and for only those tissues with outliers were removed from the OpenArray results (%CV b). Removal was acceptable because the OpenArray PCR was not duplicated like the original PCR and had a higher number of values close or below the PCR's detection limit.
